# Supplementary material
Source: HighWire-hosted journal article supplement (http://www.ajnr.org/highwire/filestream/52025/field_highwire_adjunct_files/0/1302_figure.pdf)

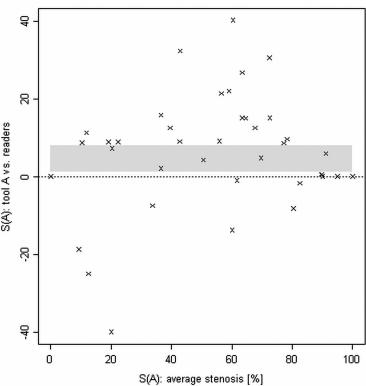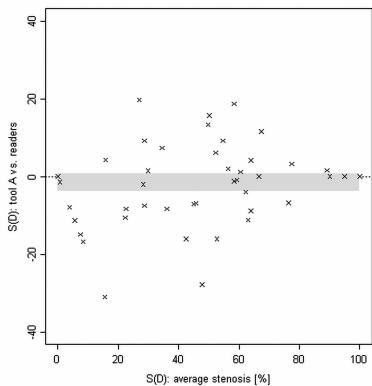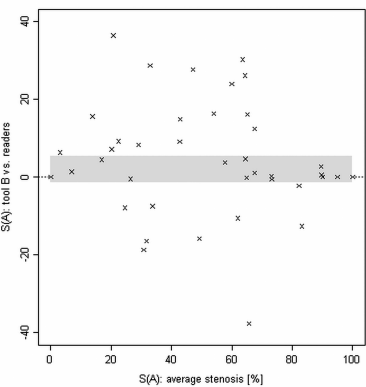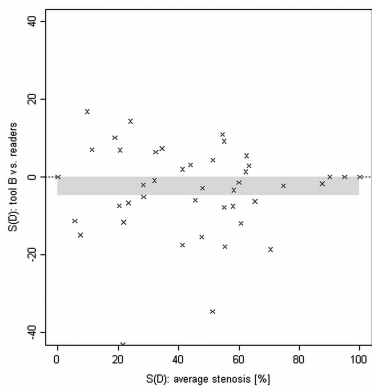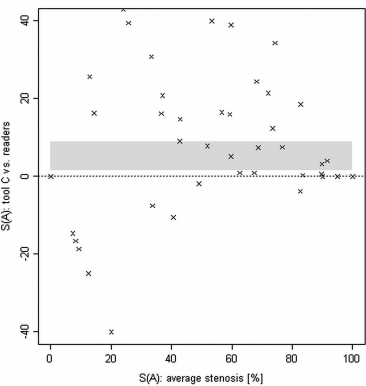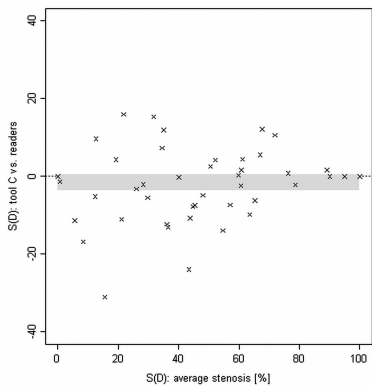

Supplement: 1302_figure.pdf [file 1302_figure.pdf]
